# Supplementary material for: Effects of lifelong spontaneous exercise on skeletal muscle and angiogenesis in super-aged mice
Source: PLOS journal article supplement (doi:10.1371/journal.pone.0263457), 2022-08-17
Supplement: S4 (10.1371/journal.pone.0263457.s004) [file journal.pone.0263457.s004]

**Young-CON**

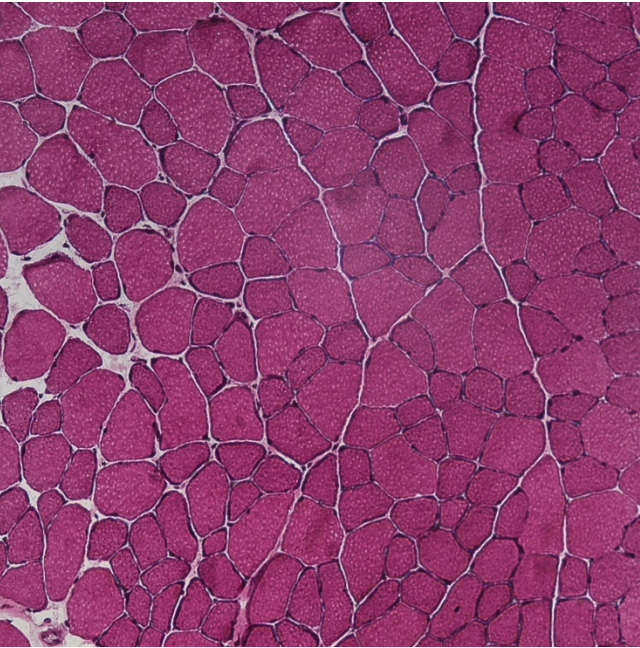

**Young-EXE**

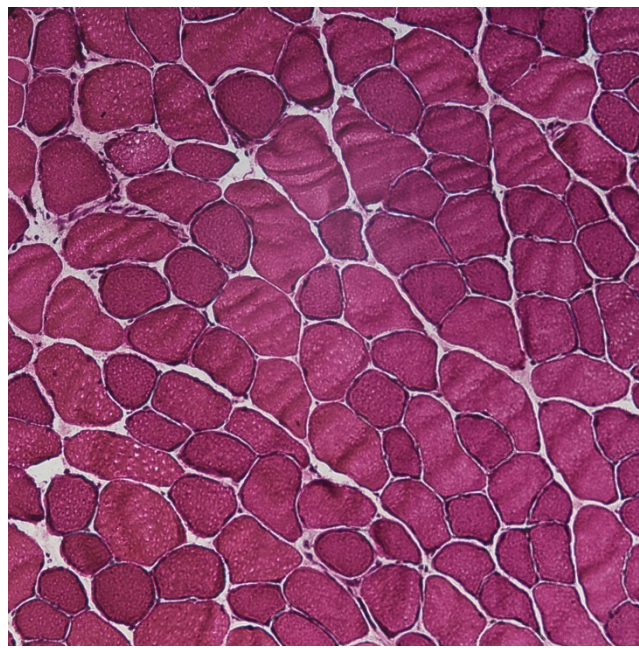

**Old-CON**

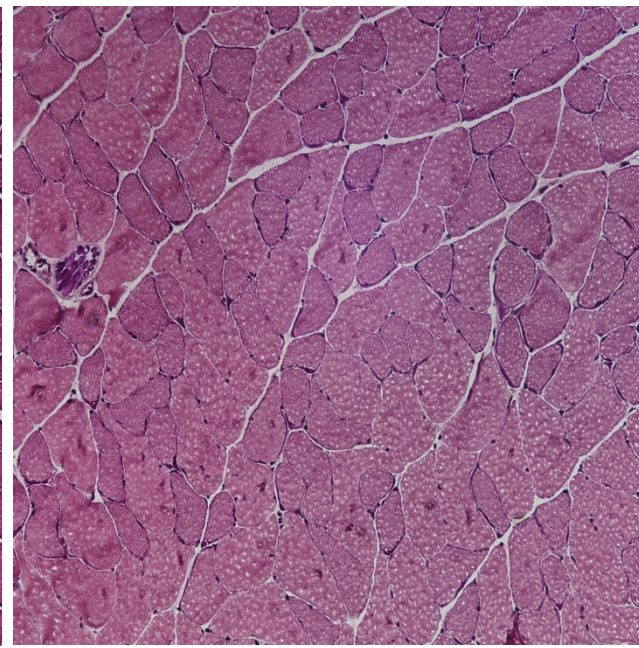

**Old-EXE**

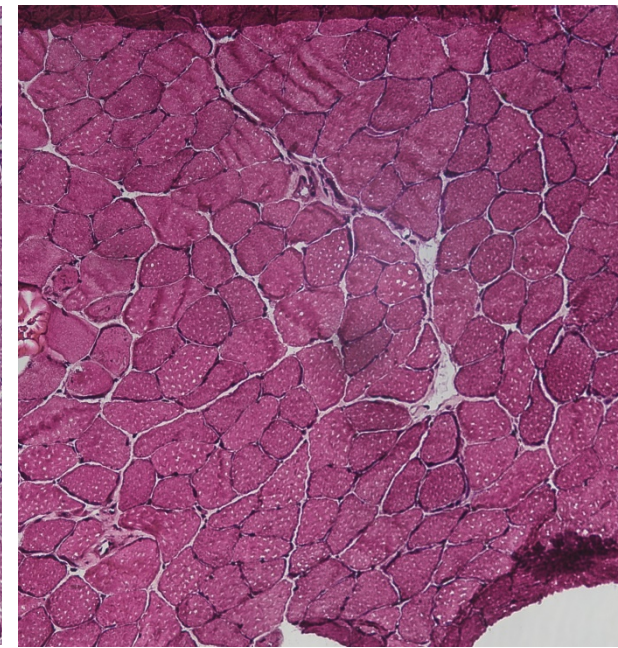

**Nikon ECLIPSE Ni**

**20X magnification**

**GAPDH**

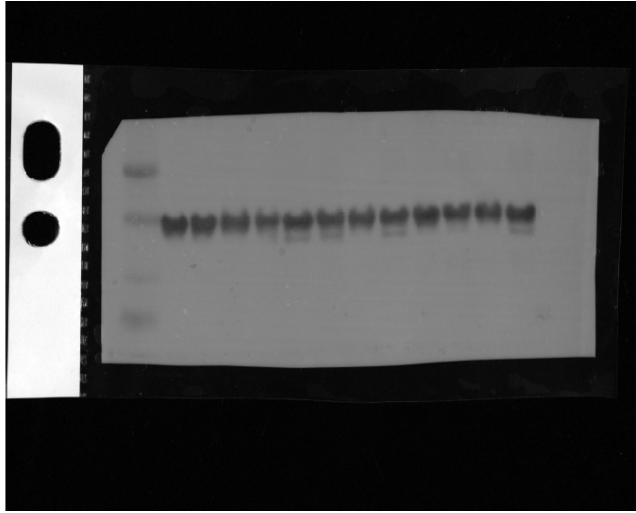

**IGF-1**

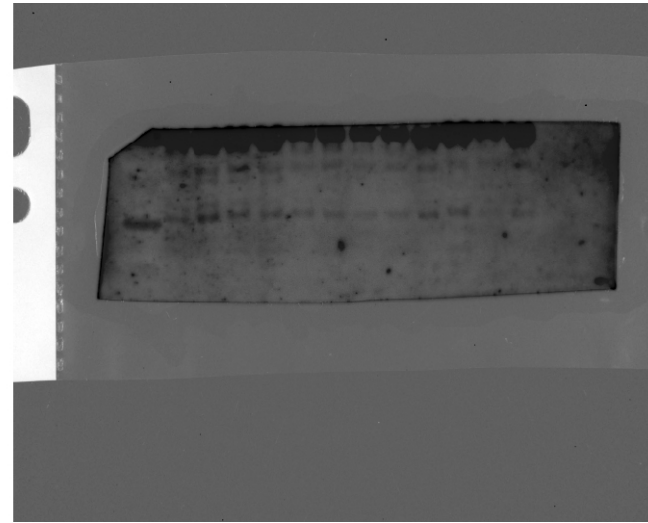

**mTOR**

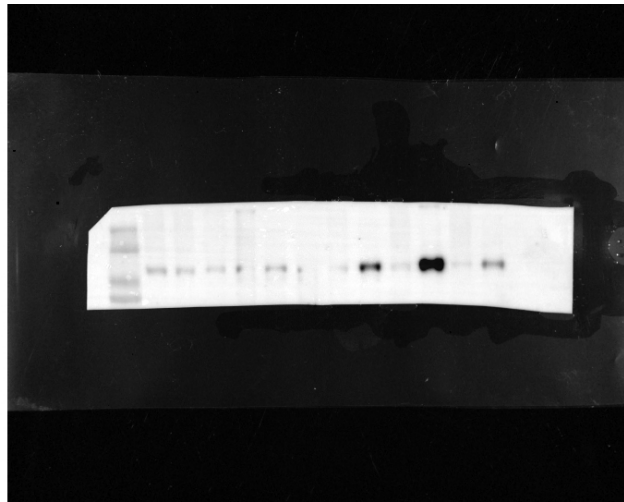

**S6K1**

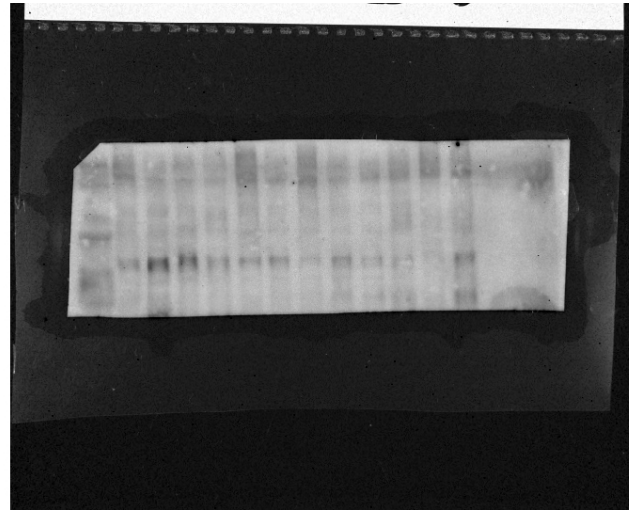

From the front, each three lanes were loaded in the order of Young-CON, Young-EXE, Old-CON and Old-EXE, respectively.



**B-Actin**

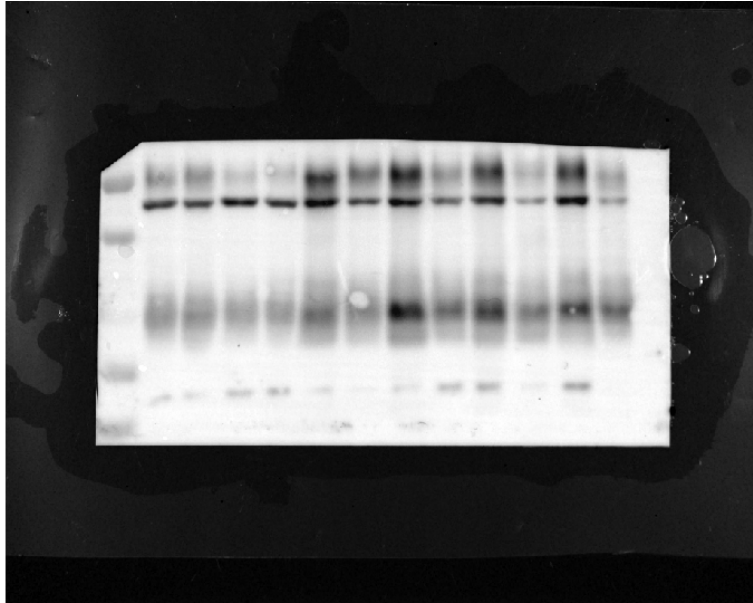

**VEGF**

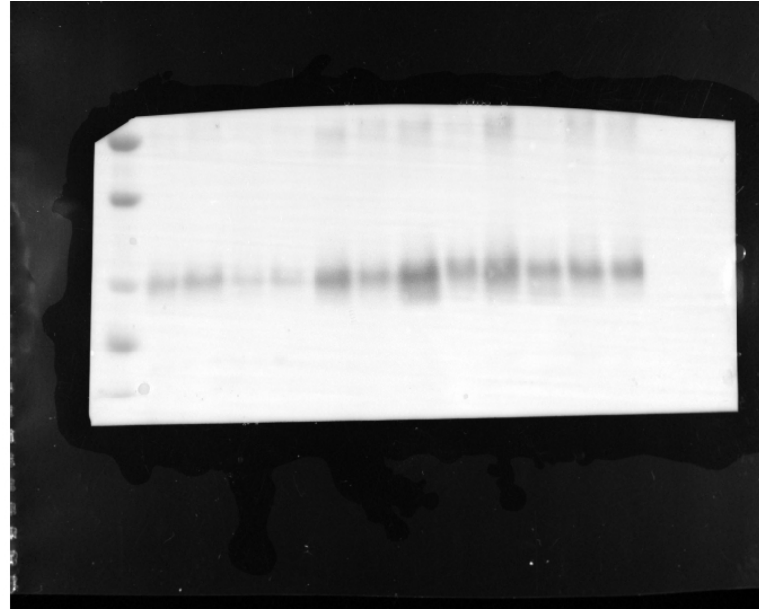

**VEGFR2**

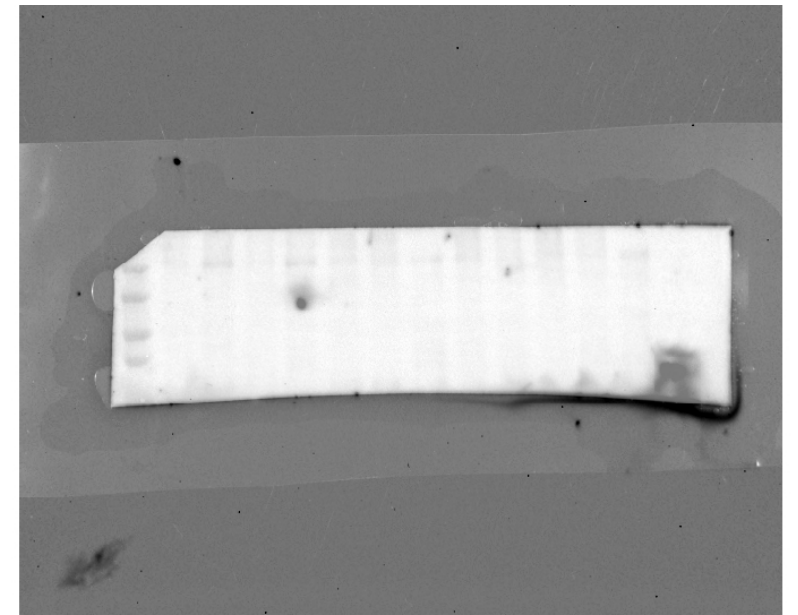

From the front, each three lanes were loaded in the order of Young-CON, Young-EXE, Old-CON and Old-EXE, respectively.

**Young-CON**

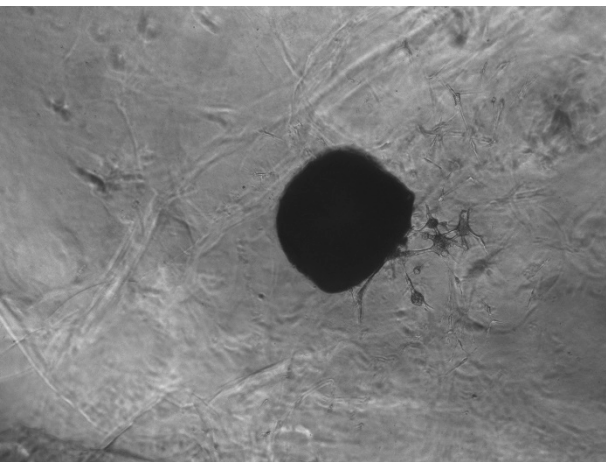

**Young-EXE**

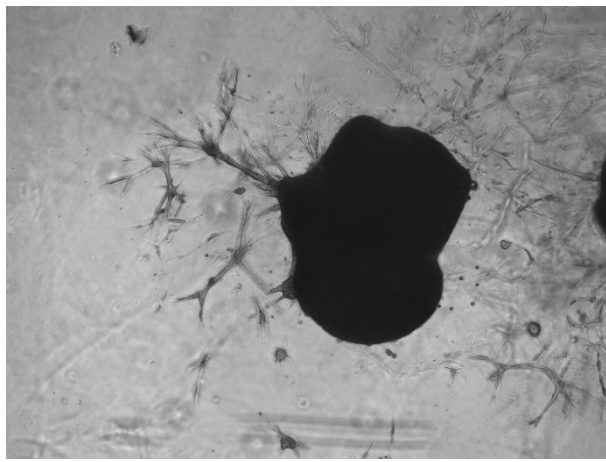

**Old-CON**

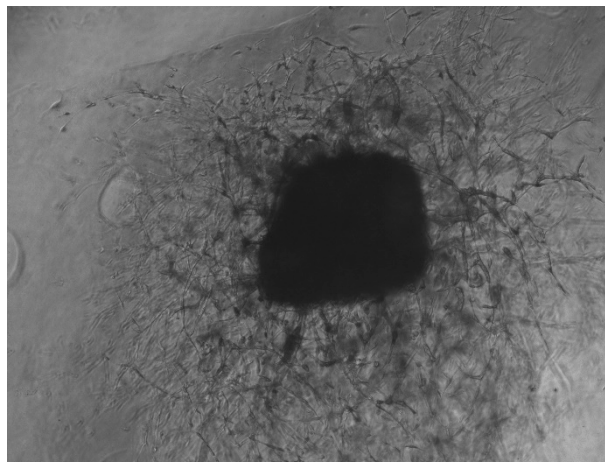

**Old-EXE**

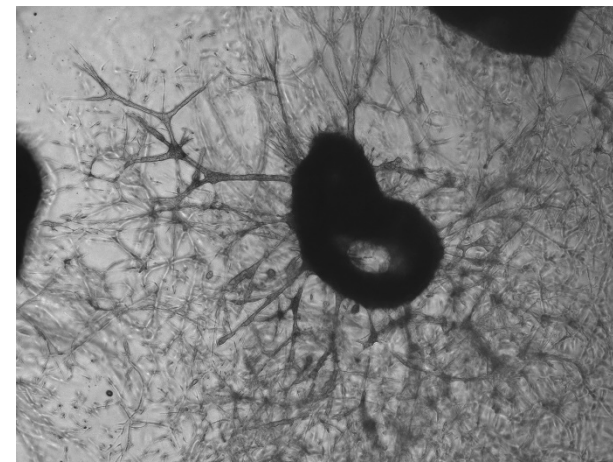

**Mouse aorta  
EVOS M5000  
10X magnification**

CON

LSS

OS

LSS+OS

0 hr

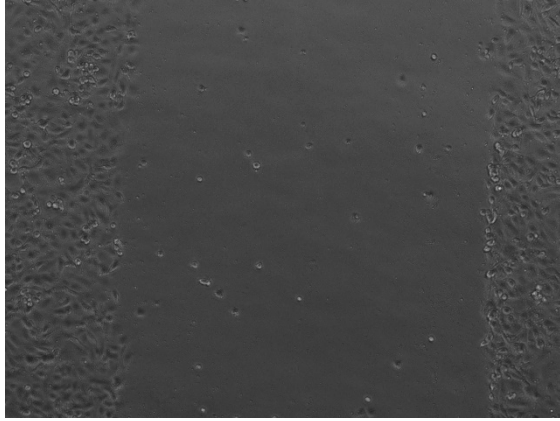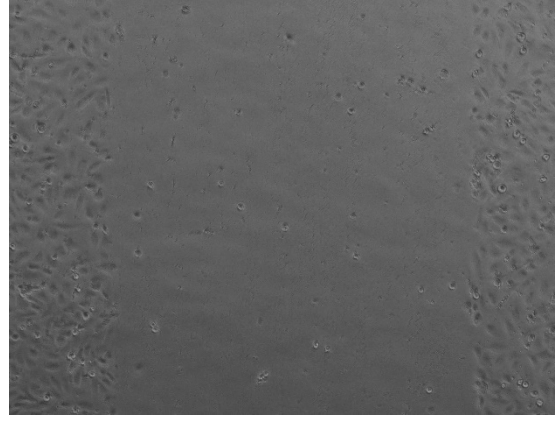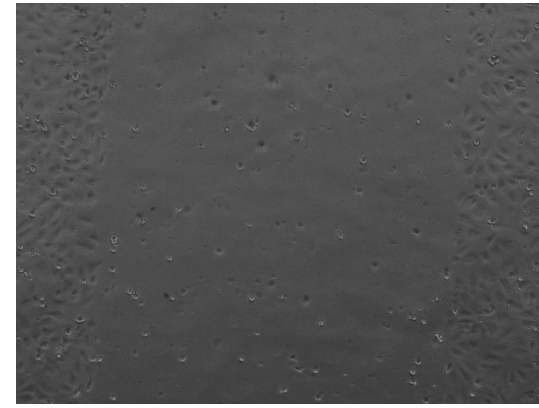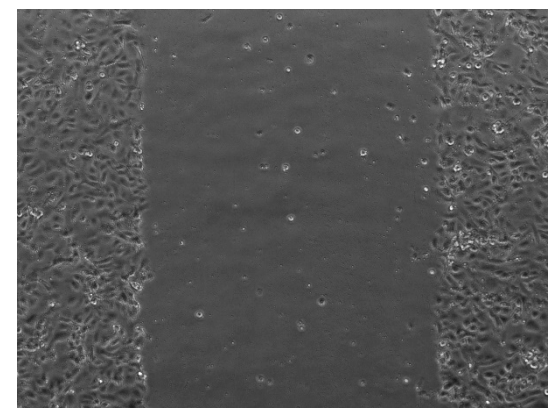

9 hr

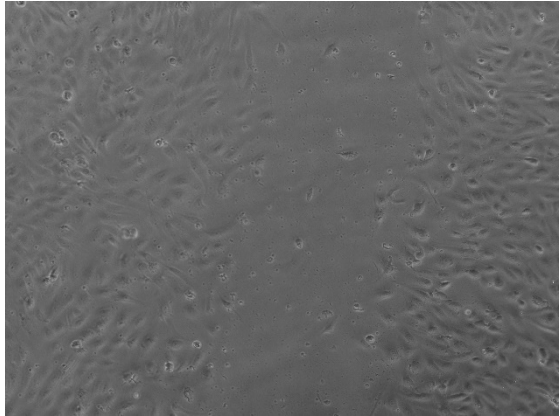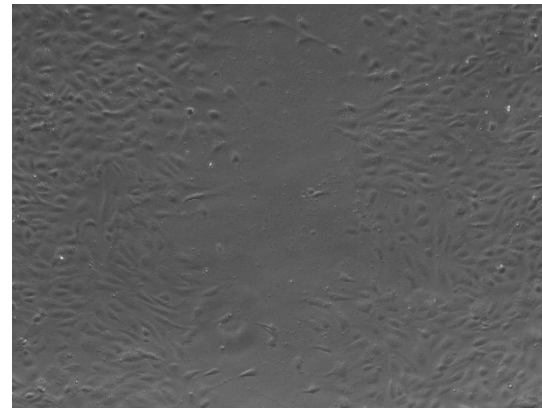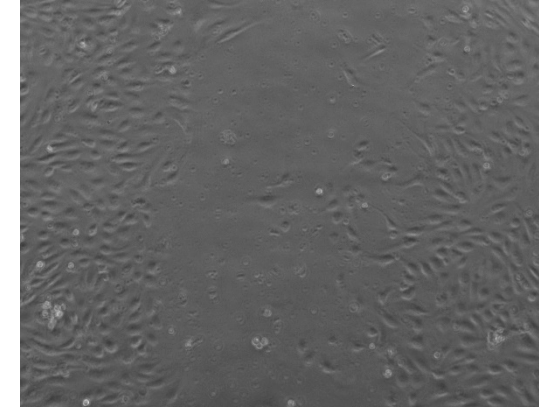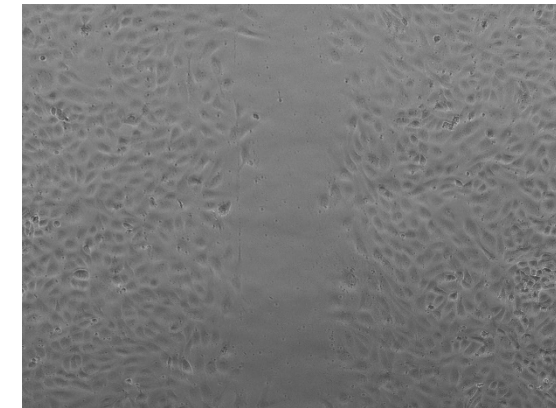

HUVEC (Human umbilical vein endothelial cells)  
EVOS M5000  
10X magnification

**CON**

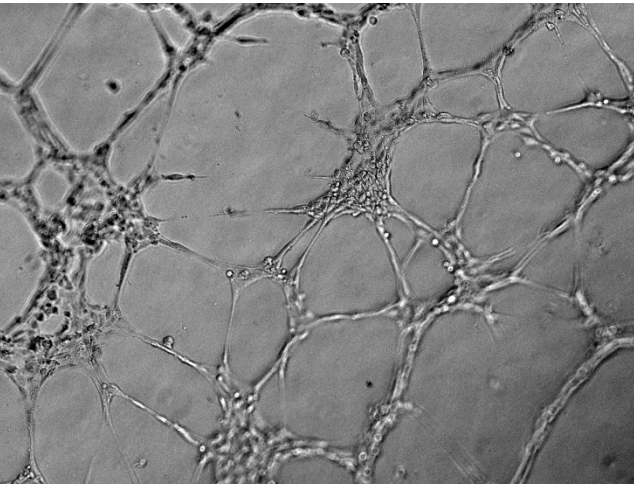

**LSS**

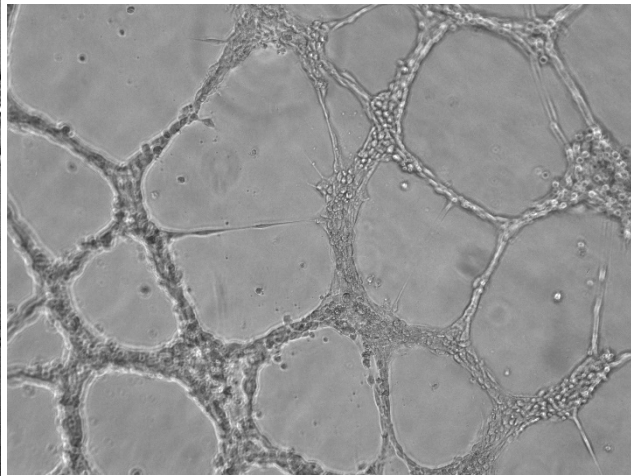

**OS**

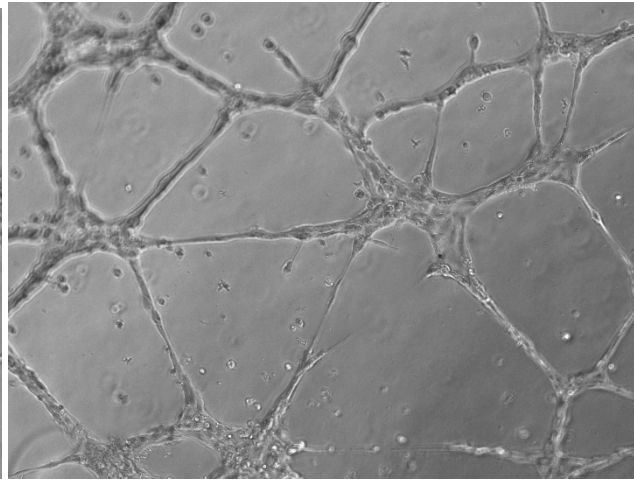

**LSS+OS**

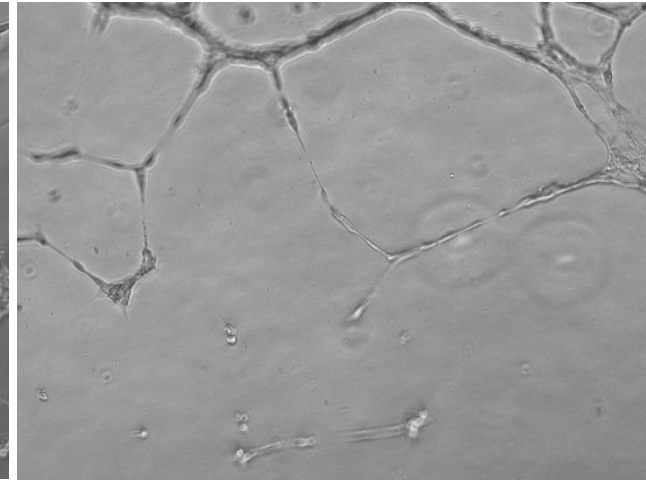

**HUVEC (Human umbilical vein endothelial cells)**  
**EVOS M5000**  
**10X magnification**
